# Supplementary material for: Review - Data Cube: A Relational Aggregation Operator Generalizing Group-By, Cross-Tab, and Sub-Total.
Source: MDPI journal article supplement (doi:10.3390/ijerph18199958), 1999-01-01
Supplement: s1 [file s1]

## Supplementary material

# Regression-Based Normative Data for Independent and Cognitively Active Spanish Older Adults: Digit Span, Letters and Numbers, Trail Making Test and Symbol Digit Modalities Test

Clara Iñesta<sup>1</sup>, Javier Oltra-Cucarella<sup>1,2,\*</sup>, Beatriz Bonete-López<sup>1,2</sup>, Eva Calderón-Rubio<sup>1</sup> and Esther Sitges-Maciá<sup>1</sup>

**Citation:** Iñesta, C.; Oltra-Cucarella, J.; Bonete-López, B.; Calderón-Rubio, E.; Sitges-Maciá, E. Regression-based normative data for independent and cognitively active Spanish older adults: Digit Span, Letters and Numbers, Trail Making Test and Symbol Digit Modalities Test. *Int. J. Environ. Res. Public Health* **2021**, *18*, 9958. <https://doi.org/10.3390/ijerph18199958>

Academic Editor: Paul B. Tchounwou

Received: 29 July 2021  
Accepted: 18 September 2021  
Published: 22 September 2021

**Publisher's Note:** MDPI stays neutral with regard to jurisdictional claims in published maps and institutional affiliations.

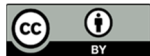

**Copyright:** © 2021 by the authors. Licensee MDPI, Basel, Switzerland. This article is an open access article distributed under the terms and conditions of the Creative Commons Attribution (CC BY) license (<http://creativecommons.org/licenses/by/4.0/>).

Table S1. Comparing number of low scores between normative data sets (NEURONORMA-SABIEX)

|            |    | SABIEX |    |       |
|------------|----|--------|----|-------|
|            |    | 0      | 1+ | Total |
| NEURONORMA | 0  | 53     | 18 | 71    |
|            | 1+ | 16     | 14 | 30    |
| Total      |    | 69     | 32 | 101   |

Table S2. Comparing number of low scores between normative data sets (NEURONORMA-SABIEX) with TMT-B conditional on TMT-A

|            |    | SABIEX |    |       |
|------------|----|--------|----|-------|
|            |    | 0      | 1+ | Total |
| NEURONORMA | 0  | 55     | 16 | 71    |
|            | 1+ | 16     | 14 | 30    |
| Total      |    | 71     | 30 | 101   |

Table S3. Comparing number of low scores on TMT-B independent (TMT-B<sub>NEURONORMA</sub>) and TMT-B conditional on TMT-A (TMT-B<sub>SABIEX</sub>)

|                             |      | TMT-B <sub>SABIEX</sub> |      |       |
|-----------------------------|------|-------------------------|------|-------|
|                             |      | SS7+                    | SS<7 | Total |
| TMT-B <sub>NEURONORMA</sub> | SS7+ | 84                      | 5    | 89    |
|                             | SS<7 | 13                      | 0    | 13    |
| Total                       |      | 97                      | 5    | 102   |
